# Supplementary material for: Two-dimensional zigzag-shaped Cd2C monolayer with a desirable bandgap and high carrier mobility
Source: Royal Society of Chemistry journal article supplement (doi:10.1039/c8tc03119c), 2018-01-01
Supplement: c8tc03119c1.pdf [file c8tc03119c1.pdf]

Supporting Information for

**Two-Dimensional Zigzag-Shape Cd<sub>2</sub>C Monolayer with a Desirable Bandgap and High Carrier Mobility**

L. B. Meng,<sup>1,\*</sup> S. Ni,<sup>1,2</sup> Y. J. Zhang,<sup>1</sup> B. Li,<sup>1</sup> X. W. Zhou,<sup>1</sup> W. D. Wu<sup>1,3</sup>

<sup>1</sup>Research Center of Laser Fusion, China Academy of Engineering Physics, Mianyang 621900, China

<sup>2</sup>Hefei National Laboratory for Physical Sciences at Microscale, University of Science and Technology of China, Hefei 230026, China

<sup>3</sup>IFSA Collaborative Innovation Center, Shanghai Jiao Tong University, Shanghai 200240, China

**Figure S1-S8:** Energies of five candidate structures; FPMD snapshots of Cd<sub>2</sub>C monolayer at 900, 1200 and 1500 K, and Cd<sub>2</sub>C–O<sub>2</sub>/H<sub>2</sub>O systems at 300 K; Compared band structure of Zn<sub>2</sub>C and PDOS under other 2D space-groups; band structures under the *a* tensile and *z* compression strains; and fitting of CBM and VBM shift with respect to the lattice dilation or compression.

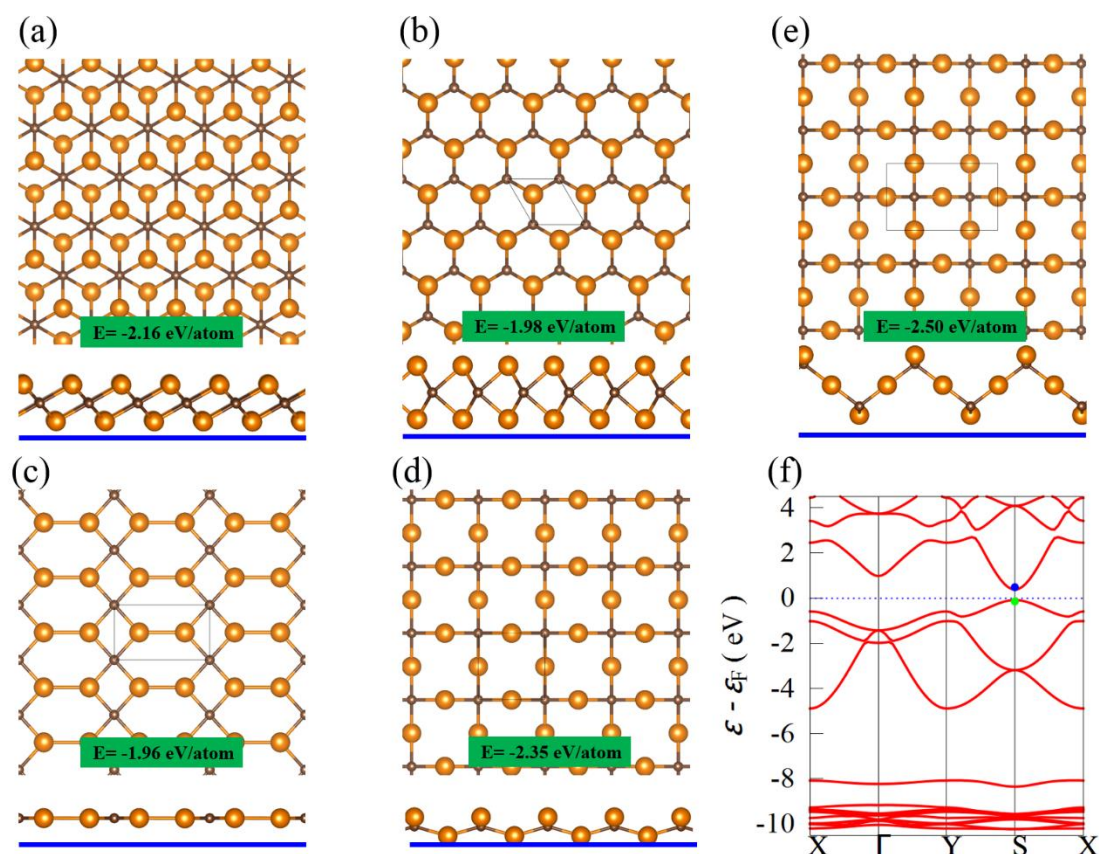

**Figure S1.** (a-e) Calculated energies of five candidate structures in the first approach of structural search. **e** corresponds to the structure discussed in the text. (f) HSE06 band structure of the second lowest-energy candidate **d** monolayer (presented for reference). The **d** monolayer is semiconducting with a narrow direct bandgap of ~0.68 eV (in HSE06) at S(1/2, 1/2, 0) point.

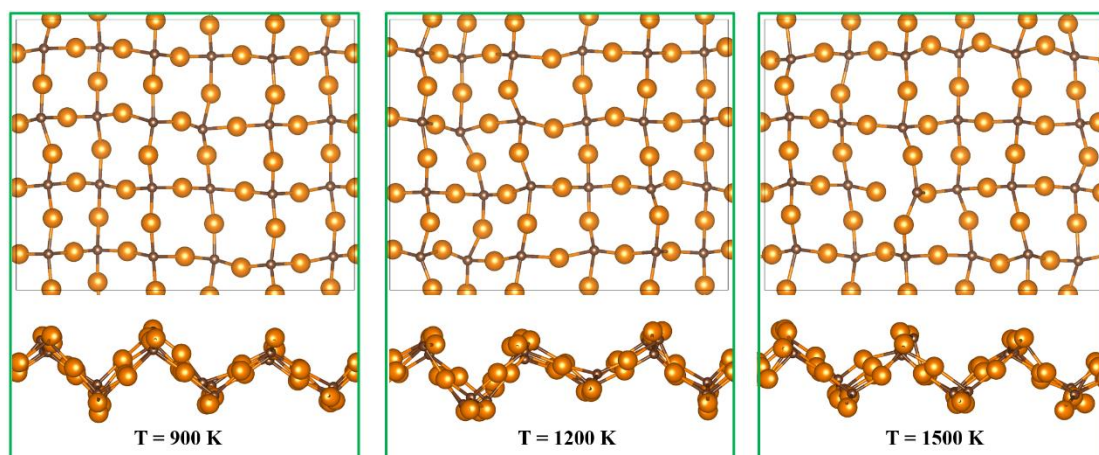

**Figure S2.** Structure snapshots for FPMD simulations of  $\text{Cd}_2\text{C}$  monolayer in  $3\times 4$  supercell at 900, 1200 and 1500 K.

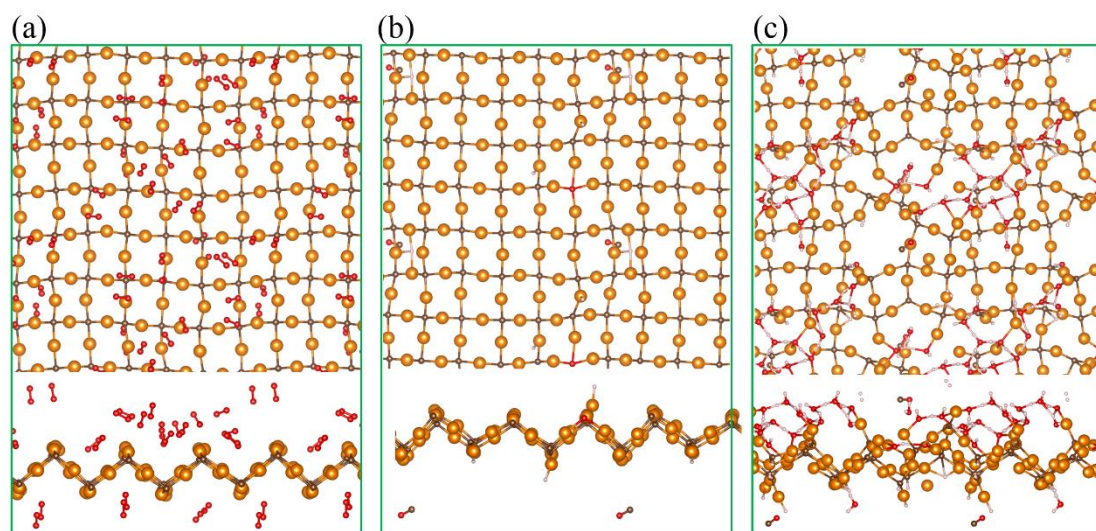

**Figure S3.** Structure snapshots for 300 K FPMD simulations of (a)  $(3\times 4)\text{Cd}_2\text{C}-24\text{O}_2$ , (b)  $(3\times 4)\text{Cd}_2\text{C}-2\text{H}_2\text{O}$  and (c)  $(3\times 4)\text{Cd}_2\text{C}-24\text{H}_2\text{O}$  systems. Note that, in  $(3\times 4)\text{Cd}_2\text{C}-2\text{H}_2\text{O}$  with a lower density of  $\text{H}_2\text{O}$ , the sheet structural integrity can basically maintain, compared to that in  $(3\times 4)\text{Cd}_2\text{C}-24\text{H}_2\text{O}$ . Thus, in a highly dry condition with infinitesimal local damages by waters, the structure and properties of the material can be expected to remain.

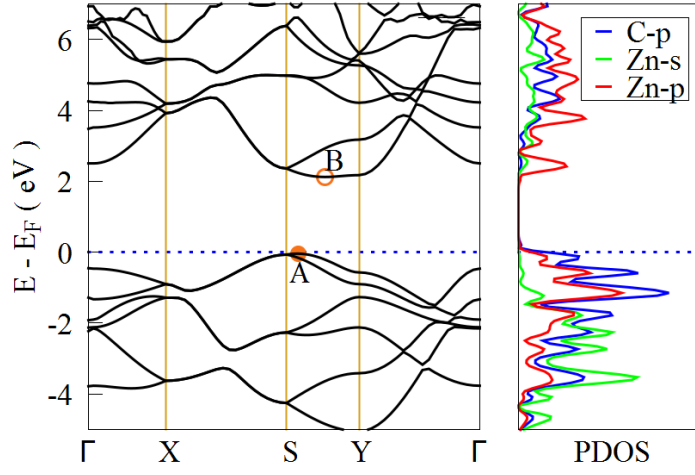

**Figure S4.** HSE06 band structure of Zn<sub>2</sub>C monolayer (for comparison). The Fermi level (dot line) is set to zero. For Zn<sub>2</sub>C monolayer, the VBM is mainly from C 2p and Zn 4p states, very similar with that the major contribution at VBM comes from C-2p and Cd-5p states in Cd<sub>2</sub>C.

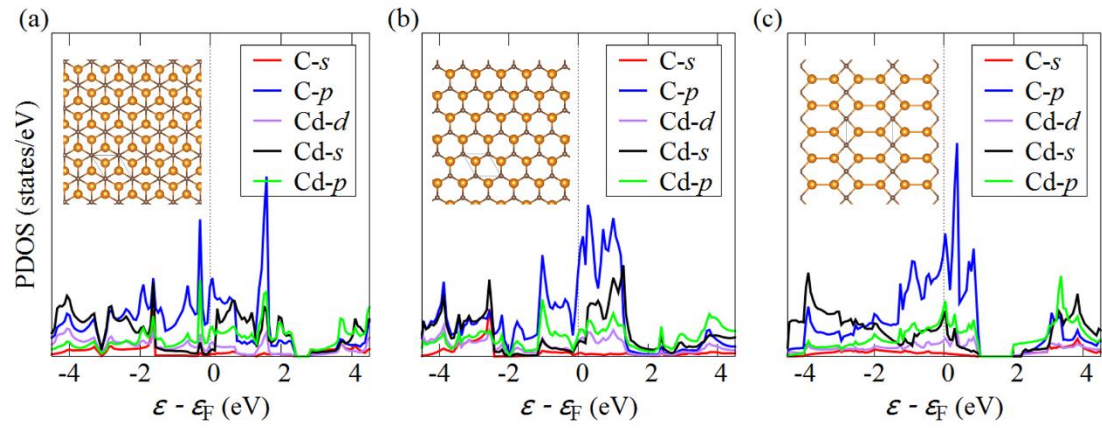

**Figure S5.** Projected density of states (PDOS) of Cd<sub>2</sub>C monolayer under space-group:  $P\bar{3}m1$ ,  $P\bar{6}m2$  and  $Pmmm$ . The Fermi level (dot line) is set to zero.

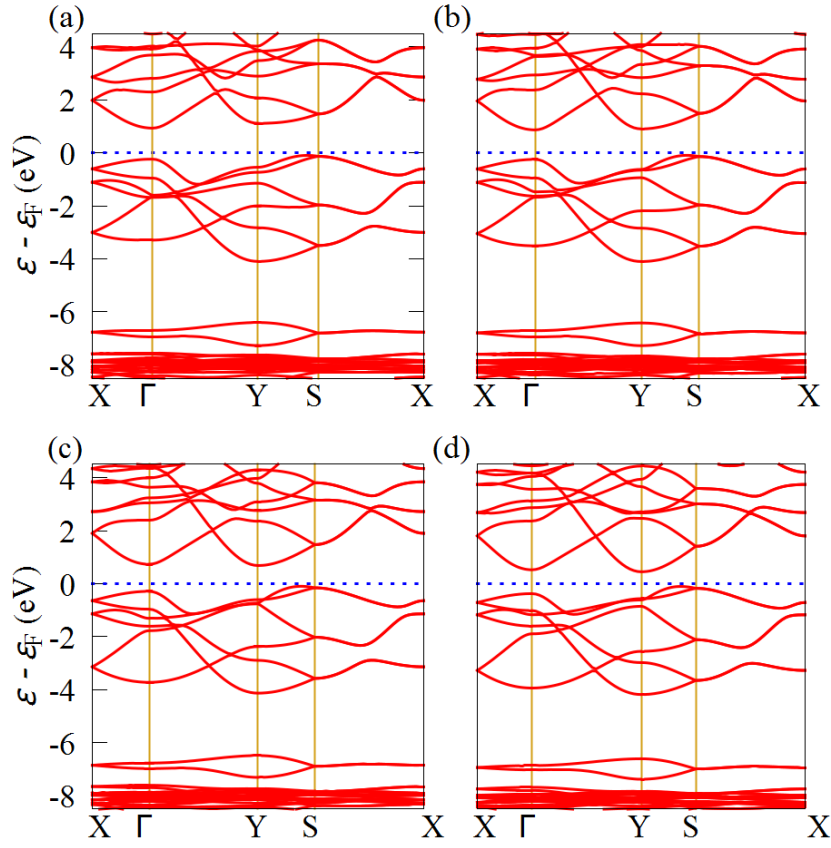

**Figure S6.** PBE band structures of Cd<sub>2</sub>C monolayer under the tensile strains of (a) 5%, (b) 10%, (c) 15% and (d) 20% along *a* direction. The Fermi energy level is set to zero. The VBM conserves in the whole strains, while the CBM at the original  $\Gamma(0, 0, 0)$  point transfers to the  $Y(0,0,1/2)$  point under 15%.



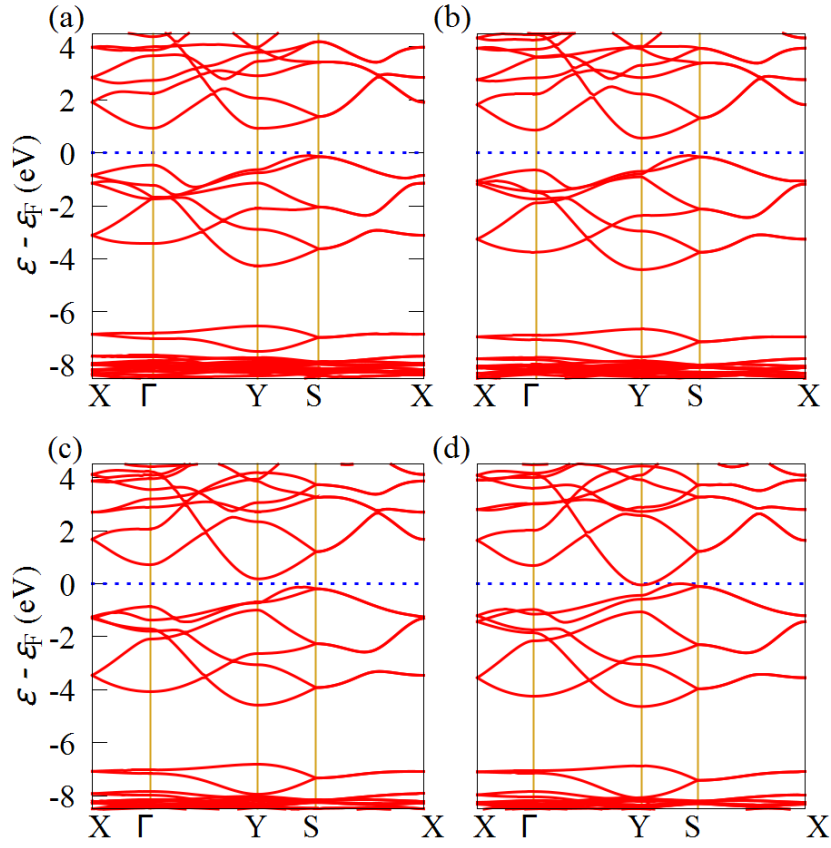

**Figure S7.** PBE band structures of Cd<sub>2</sub>C monolayer under the compression strains of (a) 10%, (b) 20%, (c) 30% and (d) 40% along *z* direction. The Fermi energy level is set to zero. The VBM conserves in the whole strains, while the CBM at the original  $\Gamma(0, 0, 0)$  point transfers to the  $Y(0,0,1/2)$  point under 10%.

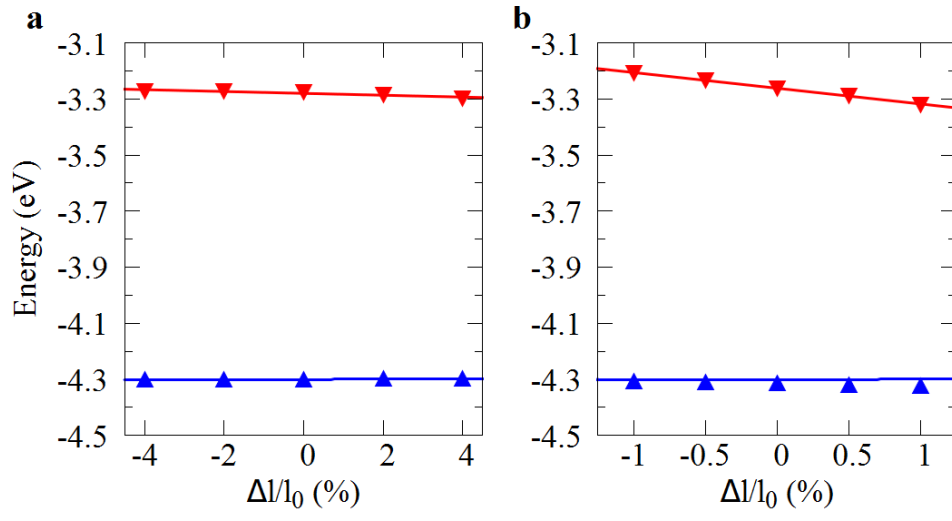

**Figure S8.** Linear fitting of the CBM and VBM shift ( $\Delta v$ ) with respect to the lattice dilation or compression ( $\Delta l/l_0$ ) along (a) *a* direction and (b) *b* direction.
